# Supplementary material
Source: MDPI journal article supplement (https://www.mdpi.com/2673-1924/2/3/34)
Supplement: s1 [file s1]

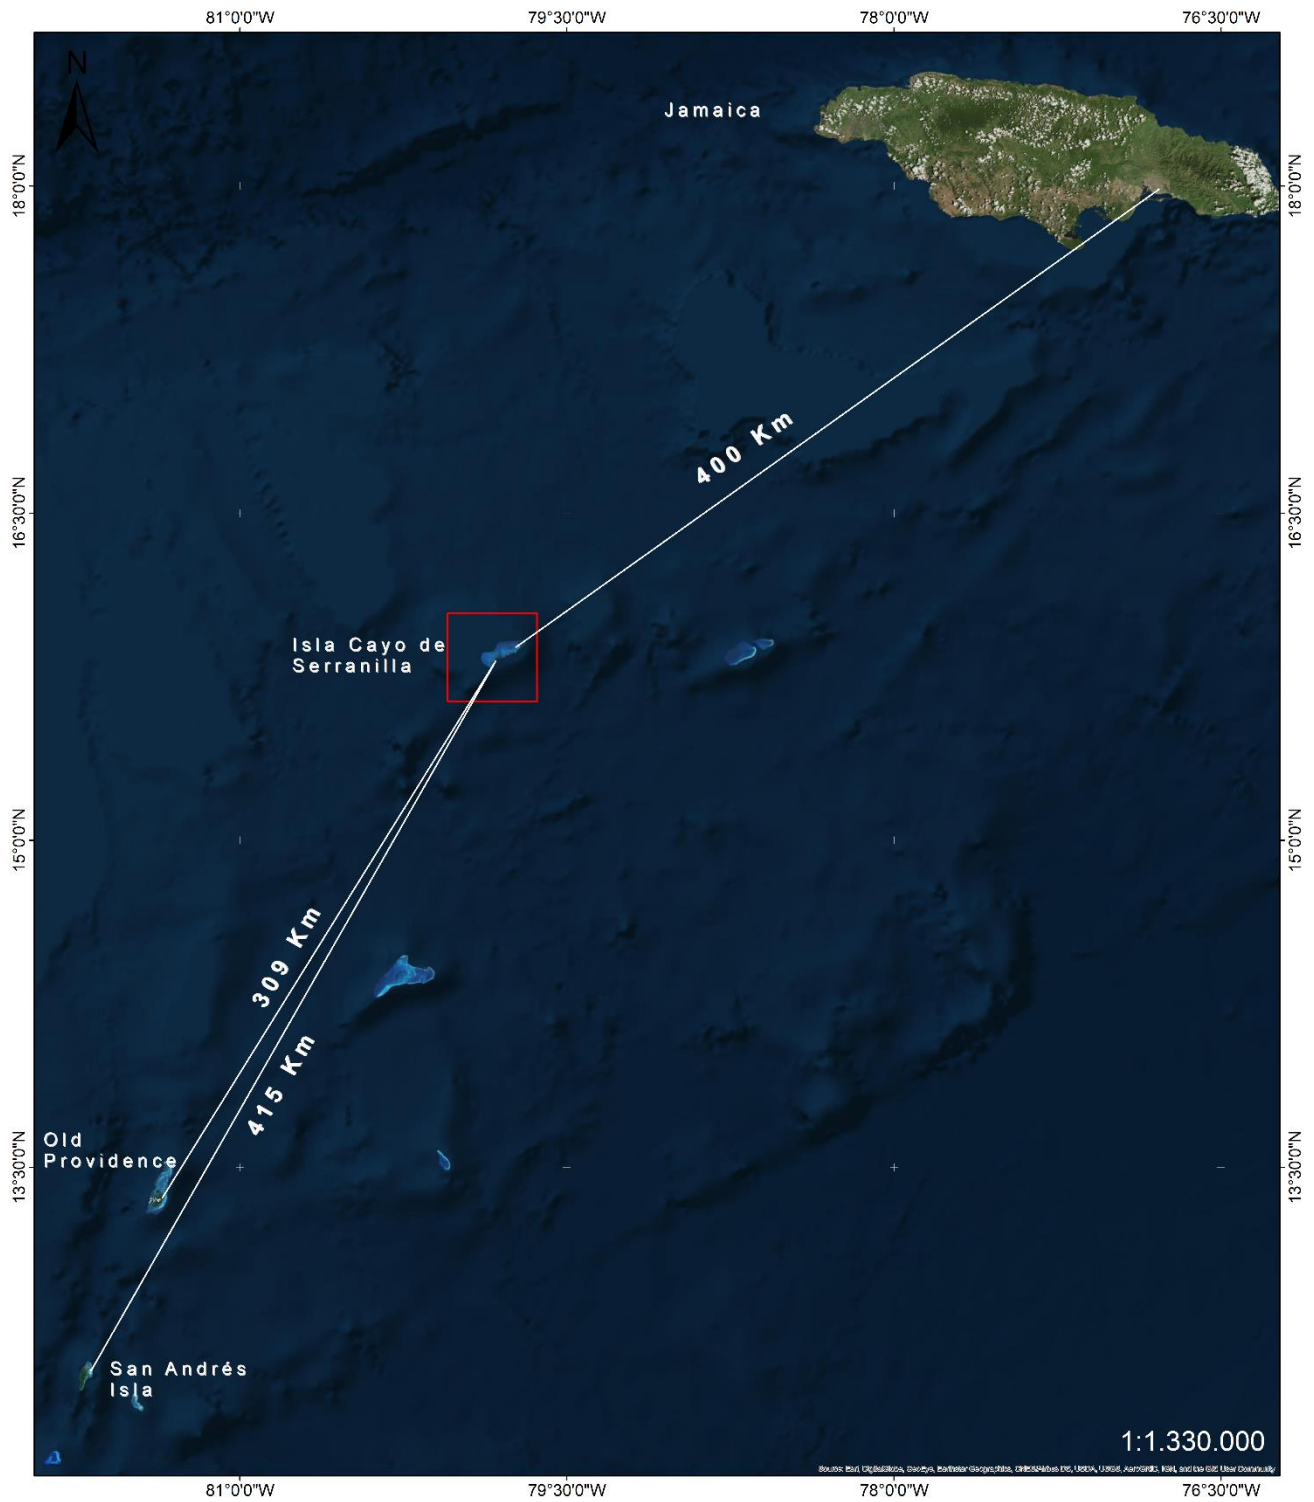

**Figure S1.** Serranilla Island and distances between islands (San Andres 415 km, Providencia 309 km, Jamaica 305 km).

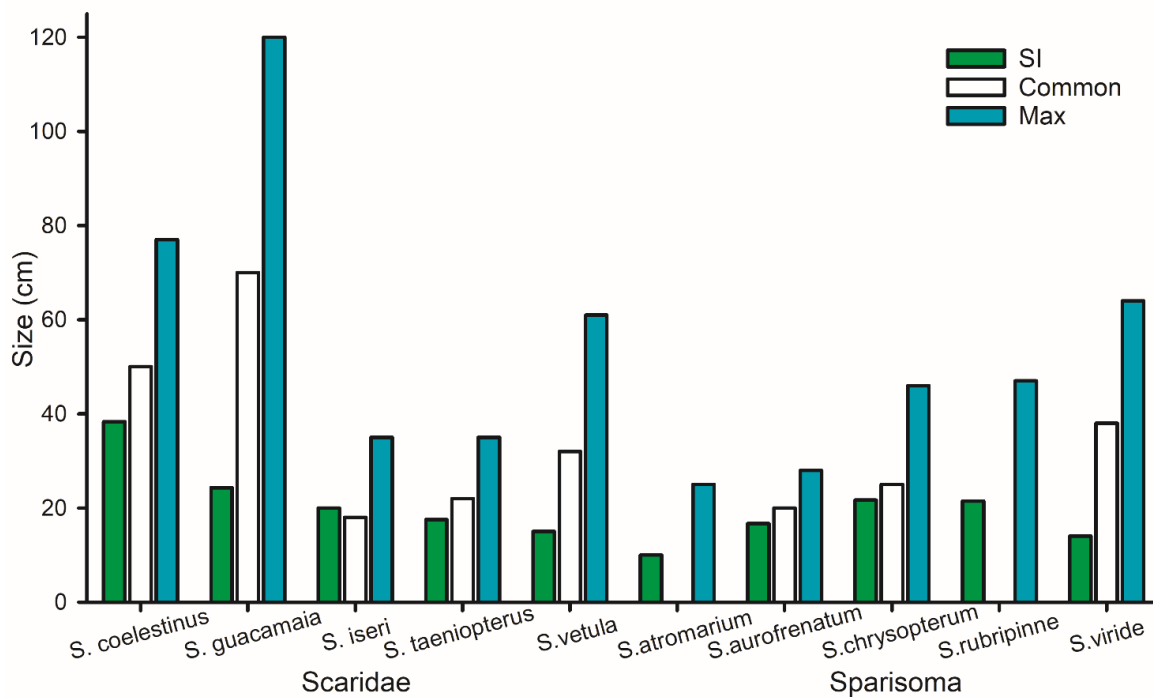

**Figure S2.** Mean observed fish sizes during census at Serranilla Island (SI) compared with the common and maximum (Max) reported in FishBase[1].

**Table S1.** Site summary of the metrics of fish assemblages in Serranilla Island with average value per metric  $\pm$  SD.

| Site | Rugosity        | Abundance           | Biomass (gr/m <sup>2</sup> ) | N0               | N1               | N2              | N21             |
|------|-----------------|---------------------|------------------------------|------------------|------------------|-----------------|-----------------|
| S1   | 0.14 $\pm$ 0.05 | 368.33 $\pm$ 322.16 | 229.15 $\pm$ 306.37          | 7.00 $\pm$ 6.56  | 3.68 $\pm$ 4.05  | 3.05 $\pm$ 3.28 | 0.86 $\pm$ 0.12 |
| S2   | 0.10 $\pm$ 0.00 | 260.00 $\pm$ 87.681 | 134.52 $\pm$ 9.14            | 13.00 $\pm$ 1.41 | 6.80 $\pm$ 1.16  | 5.32 $\pm$ 0.66 | 0.79 $\pm$ 0.04 |
| S3   | 0.27 $\pm$ 0.15 | 648.00 $\pm$ 455.00 | 187.49 $\pm$ 101.59          | 12.67 $\pm$ 6.03 | 3.98 $\pm$ 2.20  | 2.96 $\pm$ 1.57 | 0.75 $\pm$ 0.02 |
| S4   | 0.07 $\pm$ 0.04 | 154.67 $\pm$ 134.59 | 120.90 $\pm$ 102.24          | 7.00 $\pm$ 3.46  | 3.87 $\pm$ 0.91  | 3.12 $\pm$ 0.41 | 0.82 $\pm$ 0.11 |
| S5   | 0.02 $\pm$ 0.02 | 35.33 $\pm$ 6.028   | 18.58 $\pm$ 9.64             | 4.00 $\pm$ 1.00  | 2.37 $\pm$ 0.94  | 1.93 $\pm$ 0.72 | 0.82 $\pm$ 0.05 |
| S6   | 0.41 $\pm$ 0.05 | 384.67 $\pm$ 28.71  | 513.57 $\pm$ 42.67           | 21.67 $\pm$ 8.08 | 10.81 $\pm$ 4.32 | 8.04 $\pm$ 2.99 | 0.75 $\pm$ 0.05 |
| S7   | 0.10 $\pm$ 0.11 | 189.00 $\pm$ 128.69 | 117.94 $\pm$ 92.90           | 7.00 $\pm$ 4.24  | 4.72 $\pm$ 1.58  | 4.03 $\pm$ 1.05 | 0.86 $\pm$ 0.07 |
| S8   | 0.19 $\pm$ 0.01 | 249.00 $\pm$ 67.88  | 153.95 $\pm$ 74.20           | 12.5 $\pm$ 3.54  | 5.72 $\pm$ 0.64  | 4.48 $\pm$ 0.77 | 0.78 $\pm$ 0.05 |
| S9   | 0.31 $\pm$ 0.18 | 337.67 $\pm$ 181.29 | 369.37 $\pm$ 126.92          | 15.33 $\pm$ 1.53 | 6.77 $\pm$ 1.16  | 4.58 $\pm$ 0.56 | 0.68 $\pm$ 0.04 |
| S10  | 0.35 $\pm$ 0.05 | 477.5 $\pm$ 405.17  | 322.39 $\pm$ 327.61          | 17.00 $\pm$ 2.83 | 8.33 $\pm$ 2.42  | 6.46 $\pm$ 1.92 | 0.77 $\pm$ 0.01 |

**Table S2.** Summary of fish assemblage families and species in Serranilla Island. Values of abundance and biomass with the total sum, frequency, and average  $\pm$  SD.

| Family             | Species                                                 | Abundance |       |       |             | Biomass |       |       |             |
|--------------------|---------------------------------------------------------|-----------|-------|-------|-------------|---------|-------|-------|-------------|
|                    |                                                         | Sum       | Freq. | Av.   | $\pm$ SD    | Sum     | Freq. | Av.   | $\pm$ SD    |
| Acanthuridae       | <i>Acanthurus bahianus</i> Castelnau 1855               | 92        | 9     | 3.54  | $\pm$ 7.74  | 123.03  | 9     | 4.73  | $\pm$ 13.73 |
| Acanthuridae       | <i>Acanthurus chirurgus</i> (Bloch 1787)                | 137       | 9     | 5.27  | $\pm$ 15.56 | 66.29   | 9     | 2.55  | $\pm$ 6.41  |
| Acanthuridae       | <i>Acanthurus coeruleus</i> Bloch & Schneider 1801      | 33        | 6     | 1.27  | $\pm$ 3.35  | 122.80  | 6     | 4.72  | $\pm$ 19.36 |
| Aulostomidae       | <i>Aulostomus maculatus</i> Valenciennes 1841           | 1         | 1     | 0.04  | $\pm$ 0.20  | 0.42    | 1     | 0.02  | $\pm$ 0.08  |
| Balistidae         | <i>Balistes vetula</i> Linnaeus 1758                    | 15        | 9     | 0.58  | $\pm$ 1.10  | 156.02  | 9     | 6.00  | $\pm$ 9.85  |
| Balistidae         | <i>Canthidermis sufflamen</i> (Mitchill 1815)           | 14        | 9     | 0.54  | $\pm$ 0.86  | 134.89  | 9     | 5.19  | $\pm$ 9.07  |
| Balistidae         | <i>Melichthys niger</i> (Bloch 1786)                    | 77        | 8     | 2.96  | $\pm$ 9.28  | 495.87  | 8     | 19.07 | $\pm$ 49.83 |
| Blenniidae         | <i>Ophioblennius atlanticus</i> (Valenciennes 1836)     | 1         | 1     | 0.04  | $\pm$ 0.20  | 0.26    | 1     | 0.01  | $\pm$ 0.05  |
| Carangidae         | <i>Alectis ciliaris</i> (Bloch 1787)                    | 2         | 2     | 0.08  | $\pm$ 0.27  | 5.88    | 2     | 0.23  | $\pm$ 0.80  |
| Carangidae         | <i>Caranx crysos</i> (Mitchill 1815)                    | 16        | 3     | 0.58  | $\pm$ 2.35  | 51.85   | 3     | 2.11  | $\pm$ 6.41  |
| Carangidae         | <i>Caranx latus</i> Agassiz 1831                        | 1         | 1     | 0.62  | $\pm$ 2.38  | 2.98    | 1     | 1.99  | $\pm$ 7.00  |
| Carangidae         | <i>Caranx ruber</i> (Bloch 1793)                        | 15        | 4     | 0.04  | $\pm$ 0.20  | 54.82   | 4     | 0.11  | $\pm$ 0.58  |
| Chaetodontidae     | <i>Chaetodon capistratus</i> Linnaeus 1758              | 2         | 1     | 4.04  | $\pm$ 11.03 | 2.17    | 1     | 5.74  | $\pm$ 14.37 |
| Diodontidae        | <i>Diodon hystrix</i> Linnaeus 1758                     | 2         | 1     | 0.54  | $\pm$ 1.84  | 5.65    | 1     | 0.35  | $\pm$ 1.33  |
| Ginglymostomatidae | <i>Ginglymostoma cirratum</i> (Bonnaterre 1788)         | 2         | 2     | 0.08  | $\pm$ 0.27  | 78.73   | 2     | 3.03  | $\pm$ 10.70 |
| Grammatidae        | <i>Grama loreto</i> Poey 1868                           | 2         | 2     | 0.08  | $\pm$ 0.27  | 0.52    | 2     | 0.02  | $\pm$ 0.07  |
| Haemulidae         | <i>Haemulon album</i> Cuvier 1830                       | 44        | 7     | 1.69  | $\pm$ 3.89  | 901.69  | 7     | 34.68 | $\pm$ 78.90 |
| Haemulidae         | <i>Haemulon flavolineatum</i> (Desmarest 1823)          | 61        | 5     | 2.35  | $\pm$ 5.50  | 126.03  | 5     | 4.85  | $\pm$ 17.30 |
| Haemulidae         | <i>Haemulon plumieri</i> (Lacepède 1801)                | 5         | 1     | 0.19  | $\pm$ 0.98  | 3.91    | 1     | 0.15  | $\pm$ 0.77  |
| Holocentridae      | <i>Holocentrus adscensionis</i> (Osbeck 1765)           | 8         | 5     | 0.31  | $\pm$ 0.84  | 42.60   | 5     | 1.64  | $\pm$ 6.38  |
| Kyphosidae         | <i>Kyphosus sectatrix</i> (Linnaeus 1758)               | 18        | 1     | 0.69  | $\pm$ 3.53  | 269.26  | 1     | 10.36 | $\pm$ 52.81 |
| Labridae           | <i>Bodianus rufus</i> (Linnaeus 1758)                   | 6         | 3     | 0.23  | $\pm$ 0.82  | 11.89   | 3     | 0.46  | $\pm$ 1.56  |
| Labridae           | <i>Clepticus parrae</i> (Bloch & Schneider 1801)        | 6         | 3     | 0.08  | $\pm$ 0.39  | 33.82   | 3     | 0.21  | $\pm$ 1.09  |
| Labridae           | <i>Halichoeres bivittatus</i> (Bloch 1791)              | 413       | 19    | 15.88 | $\pm$ 24.21 | 68.89   | 19    | 2.65  | $\pm$ 3.89  |
| Labridae           | <i>Halichoeres garnoti</i> (Valenciennes 1839)          | 486       | 19    | 18.69 | $\pm$ 25.91 | 139.19  | 19    | 5.35  | $\pm$ 11.85 |
| Labridae           | <i>Halichoeres maculipinna</i> (Müller & Troschel 1848) | 12        | 3     | 0.46  | $\pm$ 1.39  | 16.74   | 3     | 0.64  | $\pm$ 2.50  |

|               |                                                        |     |    |               |        |    |               |
|---------------|--------------------------------------------------------|-----|----|---------------|--------|----|---------------|
| Labridae      | <i>Thalassoma bifasciatum</i> (Bloch 1791)             | 546 | 9  | 21.00 ± 74.08 | 36.41  | 9  | 1.40 ± 3.63   |
| Labridae      | <i>Xyrichtys martinicensis</i> Valenciennes 1840       | 30  | 2  | 1.15 ± 4.96   | 10.09  | 2  | 0.39 ± 1.67   |
| Lutjanidae    | <i>Lutjanus analis</i> (Cuvier 1828)                   | 77  | 1  | 2.96 ± 15.10  | 51.88  | 1  | 2.00 ± 10.18  |
| Lutjanidae    | <i>Lutjanus griseus</i> (Linnaeus 1758)                | 19  | 2  | 0.73 ± 3.53   | 46.75  | 2  | 1.80 ± 8.68   |
| Lutjanidae    | <i>Ocyurus chrysurus</i> (Bloch 1791)                  | 5   | 1  | 0.19 ± 0.98   | 24.76  | 1  | 0.95 ± 4.86   |
| Malacanthidae | <i>Malacanthus plumieri</i> (Bloch 1786)               | 6   | 4  | 0.23 ± 0.59   | 20.04  | 4  | 0.77 ± 2.15   |
| Mullidae      | <i>Mulloidichthys martinicus</i> (Cuvier 1829)         | 17  | 4  | 0.65 ± 2.04   | 611.82 | 4  | 23.53 ± 79.43 |
| Muraenidae    | <i>Gymnothorax funebris</i> Ranzani 1839               | 1   | 1  | 0.04 ± 0.20   | 0.14   | 1  | 0.01 ± 0.03   |
| Ostraciidae   | <i>Acanthostracion quadricornis</i> (Linnaeus 1758)    | 15  | 1  | 0.58 ± 2.94   | 232.44 | 1  | 8.94 ± 45.59  |
| Pempheridae   | <i>Pempheris schomburgkii</i> Müller & Troschel 1848   | 2   | 1  | 0.08 ± 0.39   | 0.60   | 1  | 0.02 ± 0.12   |
| Pomacanthidae | <i>Holacanthus ciliaris</i> (Linnaeus 1758)            | 3   | 3  | 0.12 ± 0.33   | 11.44  | 3  | 0.44 ± 1.24   |
| Pomacanthidae | <i>Holacanthus tricolor</i> (Bloch 1795)               | 6   | 5  | 0.23 ± 0.51   | 11.85  | 5  | 0.46 ± 1.19   |
| Pomacanthidae | <i>Pomacanthus paru</i> (Bloch 1787)                   | 2   | 2  | 0.08 ± 0.27   | 6.23   | 2  | 0.24 ± 0.94   |
| Pomacentridae | <i>Abudefduf saxatilis</i> (Linnaeus 1758)             | 67  | 3  | 2.58 ± 9.85   | 37.30  | 3  | 1.43 ± 4.21   |
| Pomacentridae | <i>Chromis cyanea</i> (Poey 1860)                      | 105 | 10 | 3.77 ± 11.19  | 149.26 | 10 | 5.87 ± 15.61  |
| Pomacentridae | <i>Chromis multilineata</i> (Guichenot 1853)           | 98  | 7  | 0.23 ± 0.71   | 152.70 | 7  | 1.30 ± 4.00   |
| Pomacentridae | <i>Microspathodon chrysurus</i> (Cuvier 1830)          | 143 | 8  | 5.50 ± 14.05  | 46.72  | 8  | 1.80 ± 5.54   |
| Pomacentridae | <i>Stegastes dienaecus</i> (Jordan & Rutter 1897)      | 79  | 10 | 3.04 ± 5.70   | 108.89 | 10 | 4.19 ± 11.45  |
| Pomacentridae | <i>Stegastes leucostictus</i> (Müller & Troschel 1848) | 2   | 2  | 0.08 ± 0.27   | 7.85   | 2  | 0.30 ± 1.48   |
| Pomacentridae | <i>Stegastes partitus</i> (Poey 1868)                  | 102 | 10 | 3.92 ± 14.24  | 73.03  | 10 | 2.81 ± 12.68  |
| Pomacentridae | <i>Stegastes planifrons</i> (Cuvier 1830)              | 126 | 11 | 4.85 ± 9.47   | 111.54 | 11 | 4.29 ± 10.87  |
| Pomacentridae | <i>Stegastes variabilis</i> (Castelnau 1855)           | 6   | 2  | 0.23 ± 0.99   | 0.47   | 2  | 0.02 ± 0.07   |
| Scaridae      | <i>Cryptotomus roseus</i> Cope 1871                    | 2   | 1  | 0.08 ± 0.39   | 5.58   | 1  | 0.22 ± 1.11   |
| Scaridae      | <i>Scarus coelestinus</i> Valenciennes 1840            | 7   | 4  | 0.27 ± 0.67   | 94.05  | 4  | 3.62 ± 10.83  |
| Scaridae      | <i>Scarus coeruleus</i> (Edwards 1771)                 | 2   | 1  | 0.08 ± 0.39   | 55.89  | 1  | 2.15 ± 10.96  |
| Scaridae      | <i>Scarus guacamaia</i> Cuvier 1829                    | 16  | 4  | 0.62 ± 2.55   | 21.35  | 4  | 0.82 ± 2.38   |
| Scaridae      | <i>Scarus iseri</i> (Bloch 1789)                       | 4   | 2  | 0.15 ± 0.54   | 6.38   | 2  | 0.25 ± 1.04   |
| Scaridae      | <i>Scarus taeniopterus</i> Lesson 1829                 | 12  | 3  | 0.46 ± 1.39   | 8.81   | 3  | 0.34 ± 0.96   |
| Scaridae      | <i>Scarus vetula</i> Bloch & Schneider 1801            | 3   | 2  | 0.12 ± 0.43   | 2.02   | 2  | 0.08 ± 0.29   |
| Scaridae      | <i>Sparisoma atomarium</i> (Poey 1861)                 | 5   | 2  | 0.19 ± 0.69   | 1.65   | 2  | 0.06 ± 0.27   |
| Scaridae      | <i>Sparisoma aurofrenatum</i> (Valenciennes 1840)      | 13  | 4  | 0.50 ± 1.27   | 9.32   | 4  | 0.36 ± 0.89   |

|                |                                                        |     |    |             |        |    |             |
|----------------|--------------------------------------------------------|-----|----|-------------|--------|----|-------------|
| Scaridae       | <i>Sparisoma chrysopteron</i> (Bloch & Schneider 1801) | 17  | 5  | 0.65 ± 1.60 | 36.34  | 5  | 1.40 ± 3.65 |
| Scaridae       | <i>Sparisoma rubripinne</i> (Valenciennes 1840)        | 21  | 5  | 0.81 ± 2.14 | 26.92  | 5  | 1.04 ± 2.91 |
| Scaridae       | <i>Sparisoma viride</i> (Bonnaterre 1788)              | 102 | 17 | 3.92 ± 5.83 | 124.93 | 17 | 4.80 ± 7.96 |
| Scombridae     | <i>Thunnus atlanticus</i> (Lesson 1831)                | 38  | 2  | 1.46 ± 6.87 | 0.91   | 2  | 0.04 ± 0.12 |
| Serranidae     | <i>Cephalopholis cruentata</i> (Lacepède 1802)         | 14  | 4  | 0.12 ± 0.43 | 9.11   | 4  | 0.28 ± 1.33 |
| Serranidae     | <i>Cephalopholis fulva</i> (Linnaeus 1758)             | 2   | 2  | 0.08 ± 0.39 | 7.37   | 2  | 0.08 ± 0.43 |
| Serranidae     | <i>Epinephelus guttatus</i> (Linnaeus 1758)            | 2   | 2  | 0.08 ± 0.27 | 7.08   | 2  | 0.27 ± 1.28 |
| Serranidae     | <i>Serranus tigrinus</i> (Bloch 1790)                  | 2   | 1  | 0.08 ± 0.39 | 1.12   | 1  | 0.04 ± 0.22 |
| Sphyraenidae   | <i>Sphyraena barracuda</i> (Edwards 1771)              | 7   | 4  | 0.27 ± 0.72 | 89.13  | 4  | 3.43 ± 9.41 |
| Tetraodontidae | <i>Canthigaster rostrata</i> (Bloch 1786)              | 8   | 4  | 0.31 ± 1.01 | 0.99   | 4  | 0.04 ± 0.09 |

---

**Table S3.** Summary of the abundance and biomass of the Scaridae species in Serranilla and San Andrés with the average values  $\pm$  SD.

| Scaridae species              | Abundance                    |                  |            |                 |
|-------------------------------|------------------------------|------------------|------------|-----------------|
|                               | Serranilla                   |                  | San Andrés |                 |
|                               | Sum                          | Av. $\pm$ SD     | Sum        | Av. $\pm$ SD    |
| <i>Scarus coelestinus</i>     | 6                            | 0.5 $\pm$ 0.9    |            |                 |
| <i>Scarus coeruleus</i>       | 2                            | 0.17 $\pm$ 0.58  |            |                 |
| <i>Scarus guacamaia</i>       | 16                           | 1.33 $\pm$ 3.71  |            |                 |
| <i>Scarus iseri</i>           | 2                            | 0.17 $\pm$ 0.57  | 24         | 2.00 $\pm$ 2.70 |
| <i>Scarus taeniopterus</i>    | 5                            | 0.42 $\pm$ 1.44  | 117        | 9.75 $\pm$ 3.19 |
| <i>Scarus vetula</i>          | 1                            | 0.08 $\pm$ 0.28  | 3          | 0.25 $\pm$ 0.62 |
| <i>Sparisoma atromarium</i>   | 5                            | 0.42 $\pm$ 0.99  |            |                 |
| <i>Sparisoma aurofrenatum</i> | 10                           | 0.83 $\pm$ 1.64  | 73         | 6.08 $\pm$ 3.53 |
| <i>Sparisoma chrysopteron</i> | 17                           | 1.42 $\pm$ 2.15  |            |                 |
| <i>Sparisoma rubripinne</i>   | 20                           | 1.67 $\pm$ 2.96  | 1          | 0.08 $\pm$ 0.29 |
| <i>Sparisoma viride</i>       | 107                          | 8.92 $\pm$ 9.29  | 19         | 1.58 $\pm$ 1.00 |
|                               | Biomass (gr/m <sup>2</sup> ) |                  |            |                 |
|                               | Sum                          | Av. $\pm$ SD     | Sum        | Av. $\pm$ SD    |
|                               |                              |                  |            |                 |
| <i>Scarus coelestinus</i>     | 90.68                        | 7.56 $\pm$ 15.31 |            |                 |
| <i>Scarus coeruleus</i>       | 55.89                        | 4.66 $\pm$ 16.14 |            |                 |
| <i>Scarus guacamaia</i>       | 21.34                        | 1.78 $\pm$ 3.32  |            |                 |
| <i>Scarus iseri</i>           | 5.02                         | 0.42 $\pm$ 1.45  | 2.51       | 0.21 $\pm$ 0.35 |
| <i>Scarus taeniopterus</i>    | 2.99                         | 0.25 $\pm$ 0.86  | 25.98      | 2.17 $\pm$ 1.66 |
| <i>Scarus vetula</i>          | 0.67                         | 0.06 $\pm$ 0.19  | 2.02       | 0.17 $\pm$ 0.42 |
| <i>Sparisoma atromarium</i>   | 1.36                         | 0.11 $\pm$ 0.38  |            |                 |
| <i>Sparisoma aurofrenatum</i> | 7.56                         | 0.63 $\pm$ 1.17  | 30.42      | 2.53 $\pm$ 1.68 |
| <i>Sparisoma chrysopteron</i> | 36.28                        | 3.02 $\pm$ 4.98  |            |                 |
| <i>Sparisoma rubripinne</i>   | 35.26                        | 2.94 $\pm$ 4.65  | 3.03       | 0.25 $\pm$ 0.88 |
| <i>Sparisoma viride</i>       | 108.96                       | 9.08 $\pm$ 9.84  | 19.20      | 1.60 $\pm$ 1.38 |

**Table S4.** SIMPER analysis summary. Scaridae average contribution and cumulative contribution percentage in biomass and abundance to the dissimilarity between SI and SAI. Registered and common length<sup>a</sup> of those species. <sup>a</sup> Common length obtained from FishBase [1]; <sup>b</sup> Max length used instead of common length.

| Abundance Av. Diss 71.45      |         | SIMPER       |                   | Length (cm)     |  |
|-------------------------------|---------|--------------|-------------------|-----------------|--|
| Species                       | % Cont. | % Cum. Cont. | Registered        | Common          |  |
| <i>Scarus taeniopterus</i>    | 26.30   | 26.30        | 17.5 $\pm$ 3.54   | 22              |  |
| <i>Sparisoma aurofrenatum</i> | 20.81   | 47.11        | 16.67 $\pm$ 2.89  | 20              |  |
| <i>Sparisoma viride</i>       | 11.20   | 58.30        | 14.03 $\pm$ 4.75  | 38              |  |
| <i>Scarus iseri</i>           | 10.07   | 68.37        | 20 $\pm$ 7.07     | 18              |  |
| <i>Sparisoma chrysopteron</i> | 7.03    | 75.40        | 21.67 $\pm$ 4.71  | 25              |  |
| <i>Sparisoma rubripinne</i>   | 6.50    | 81.90        | 21.46 $\pm$ 9.44  | 47 <sup>b</sup> |  |
| <i>Scarus guacamaia</i>       | 6.26    | 88.16        | 24.29 $\pm$ 11.09 | 70              |  |

**Biomass Av. Diss 71.20**

**Species**

|                               |       |       |               |      |
|-------------------------------|-------|-------|---------------|------|
| <i>Scarus taeniopterus</i>    | 19.41 | 19.41 | 17.5 ± 3.54   | 22   |
| <i>Sparisoma aurofrenatum</i> | 18.84 | 38.25 | 16.67 ± 2.89  | 20   |
| <i>Sparisoma viride</i>       | 13.23 | 51.48 | 14.03 ± 4.75  | 38   |
| <i>Sparisoma chrysopteron</i> | 9.26  | 60.74 | 21.67 ± 4.71  | 25   |
| <i>Scarus coelestinus</i>     | 8.98  | 69.72 | 38.33 ± 11.55 | 50   |
| <i>Sparisoma rubripinne</i>   | 8.33  | 78.05 | 21.46 ± 9.44  | 47 * |
| <i>Scarus guacamaia</i>       | 7.60  | 85.65 | 24.29 ± 11.09 | 70   |

---

**References**

1. Froese, R.; Pauly, D. Fish Base. World Wide Web Electronic Publication. Available online: [www.fishbase.org](http://www.fishbase.org) (accessed on 12 December 2019).
